# Supplementary material for: Robust negative differential resistance and abnormal magnetoresistance effects in heteroatom-substituted zigzag γ-graphyne nanoribbon homojunctions
Source: Royal Society of Chemistry journal article supplement (doi:10.1039/c8tc05240a), 2018-12-22
Supplement: c8tc05240a1.pdf [file c8tc05240a1.pdf]

## Supplementary Information

### **Robust negative differential resistance and abnormal magnetoresistance effects in heteroatom-substituted zigzag $\gamma$ -graphyne nanoribbon homojunctions**

Jin Li <sup>a,b</sup>, Zhi Yang <sup>a,c\*</sup>, Li-Chun Xu <sup>c</sup>, Yongzhen Yang <sup>a,d</sup>, Xuguang Liu <sup>a,e\*</sup>

<sup>a</sup> Key Lab of Interface Science and Engineering in Advanced Materials, (Taiyuan University of Technology), Ministry of Education, Taiyuan 030024, China.

<sup>b</sup> College of Chemistry and Chemical Engineering, Taiyuan University of Technology, Taiyuan 030024, China

<sup>c</sup> College of Physics and Optoelectronics, Taiyuan University of Technology, Taiyuan 030024, China.

<sup>d</sup> Research Center of Advanced Materials Science and Technology, Taiyuan University of Technology, Taiyuan 030024, China

<sup>e</sup> College of Materials Science and Engineering, Taiyuan University of Technology, Taiyuan 030024, China

---

\* Corresponding authors.

Email address: [liuxuguang@tyut.edu.cn](mailto:liuxuguang@tyut.edu.cn) (Xuguang Liu); [yangzhi@tyut.edu.cn](mailto:yangzhi@tyut.edu.cn) (Zhi Yang)

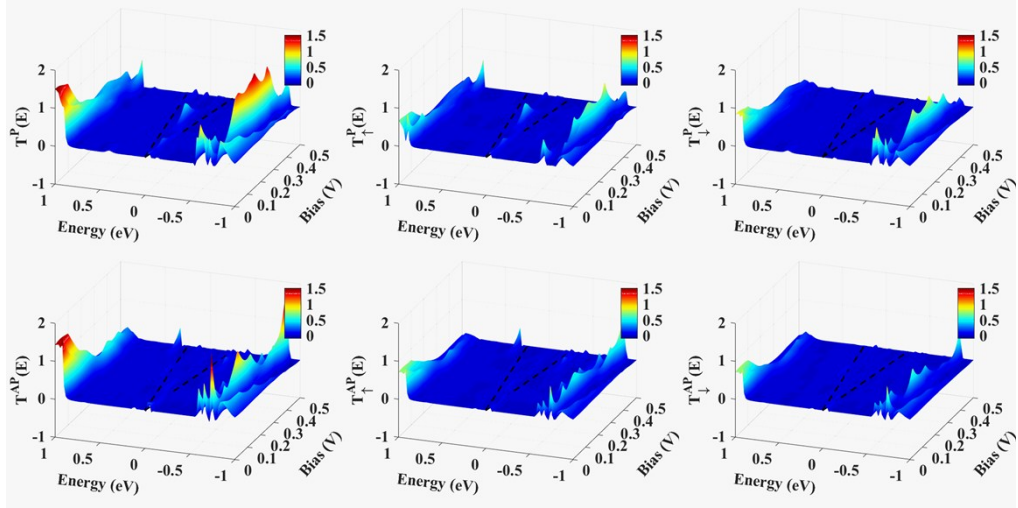

**Fig. S1** Spin-resolved transmission spectra of O-substituted  $Z\gamma$ GYNR homojunction for P and AP spin configurations. The black lines indicate bias window and the Fermi level is shifted to zero.

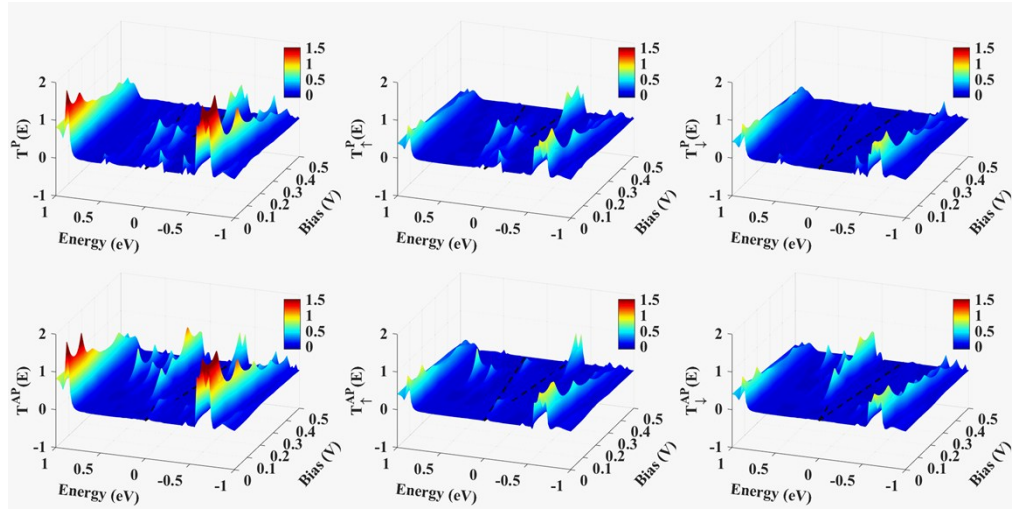

**Fig. S2** Spin-resolved transmission spectra of B-substituted  $Z\gamma$ GYNR homojunction for P and AP spin configurations. The black lines indicate bias window and the Fermi level is shifted to zero.

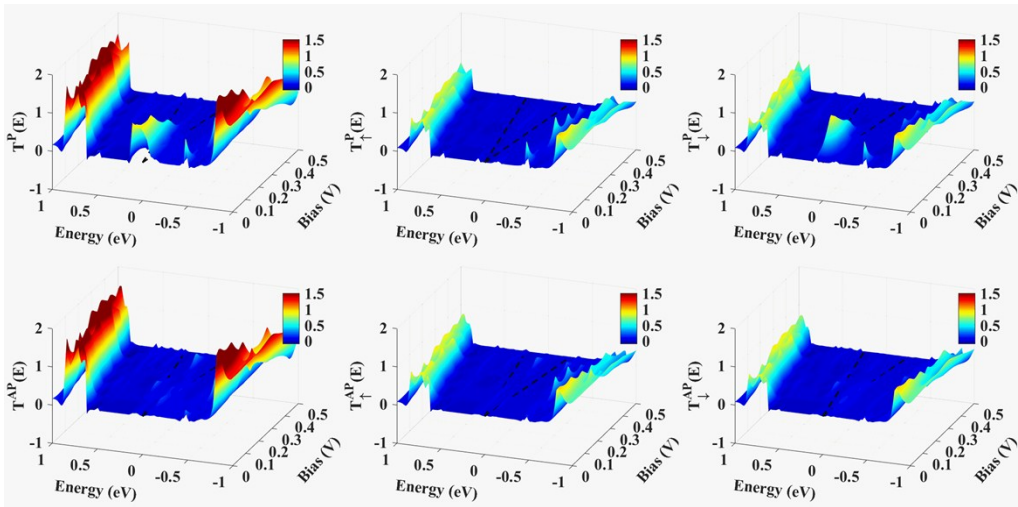

**Fig. S3** Spin-resolved transmission spectra of N-substituted  $Z\gamma$ GYNR homojunction for P and AP spin configurations. The black lines indicate bias window and the Fermi level is shifted to zero.
